# Supplementary material
Source: publisher site journal article supplement (http://kjim.org/upload/media/kjim-2021-043-suppl2.pdf)
Supplement: Supplementary file 1 [file kjim-2021-043-suppl2.pdf]

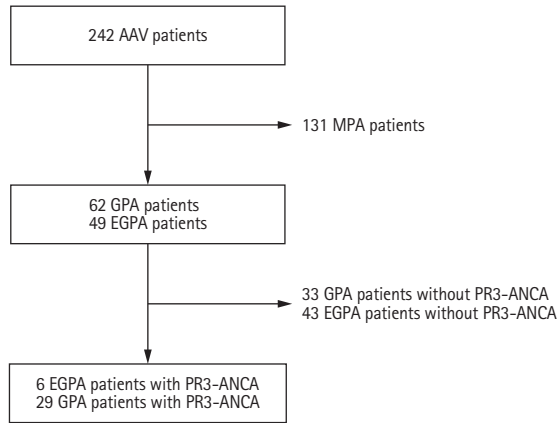

**Supplementary Figure 1.** Selection of the study population. AAV, ANCA-associated vasculitis; MPA, microscopic polyangiitis ; GPA, granulomatosis with polyangiitis; EGPA, eosinophilic granulomatosis with polyangiitis; PR3, proteinase 3; ANCA, antineutrophil cytoplasmic antibody.
